# Supplementary material for: Simultaneous determination of methocarbamol and aspirin binary mixture in their combined tablets by derivative and ratio derivative spectrophotometry
Source: Royal Society of Chemistry journal article supplement (doi:10.1039/c3ay42163e), 2014-01-21
Supplement: c3ay42163e1.pdf [file c3ay42163e1.pdf]

**Supplementary Information:**

**Table S1. Analytical performance data for the determination of the studied drugs by first derivative spectrophotometric method.**

| <b>Parameter</b>                                                   | <b>MET</b>        | <b>ASP</b>        |
|--------------------------------------------------------------------|-------------------|-------------------|
| <b>Concentration range (<math>\mu\text{g/mL}</math>)</b>           | <b>2.00-30.00</b> | <b>2.00-30.00</b> |
| <b>Correlation coefficient</b>                                     | <b>0.9999</b>     | <b>0.9999</b>     |
| <b>Slope</b>                                                       | <b>0.0531</b>     | <b>0.1014</b>     |
| <b>Intercept</b>                                                   | <b>0.0002</b>     | <b>-0.1431</b>    |
| <b>Limit of detection (LOD) (<math>\mu\text{g/mL}</math>)</b>      | <b>0.2998</b>     | <b>0.3227</b>     |
| <b>Limit of Quantification (LOQ) (<math>\mu\text{g/mL}</math>)</b> | <b>0.9084</b>     | <b>0.9780</b>     |
| <b>Standard deviation of the residuals (<math>S_{y/x}</math>)</b>  | <b>0.0068</b>     | <b>0.0139</b>     |
| <b>Standard deviation of the intercept (<math>S_a</math>)</b>      | <b>0.0048</b>     | <b>0.0099</b>     |
| <b>Standard deviation of the slope (<math>S_b</math>)</b>          | <b>0.0003</b>     | <b>0.0005</b>     |
| <b>% RSD (<math>\text{SD} \times 100 / \text{X}</math>)</b>        | <b>0.9410</b>     | <b>0.7870</b>     |
| <b>% Error (<math>\% \text{RSD} / \sqrt{n}</math>)</b>             | <b>0.3560</b>     | <b>0.2970</b>     |

**Table S2. Analytical performance data for the determination of the studied drugs by ratio first derivative spectrophotometric method.**

| Parameter                                          | MET          | ASP                         |                             |
|----------------------------------------------------|--------------|-----------------------------|-----------------------------|
|                                                    |              | $\lambda= 238.2 \text{ nm}$ | $\lambda= 246.0 \text{ nm}$ |
| Concentration range ( $\mu\text{g/mL}$ )           | 2.00 – 30.00 |                             |                             |
| Correlation coefficient                            | 0.9999       | 0.9999                      | 0.9999                      |
| Slope                                              | 0.1621       | 0.7148                      | 0.6560                      |
| Intercept                                          | -0.0271      | -0.8316                     | -0.8631                     |
| Limit of detection (LOD) ( $\mu\text{g/mL}$ )      | 0.2795       | 0.2485                      | 0.4173                      |
| Limit of Quantification (LOQ) ( $\mu\text{g/mL}$ ) | 0.8470       | 0.7530                      | 1.2647                      |
| Standard deviation of the residuals ( $S_{y/x}$ )  | 0.0193       | 0.0757                      | 0.1166                      |
| Standard deviation of the intercept ( $S_a$ )      | 0.0137       | 0.0538                      | 0.0830                      |
| Standard deviation of the slope ( $S_b$ )          | 0.0008       | 0.0030                      | 0.0046                      |
| % RSD ( $SD \times 100 / X$ )                      | 0.8491       | 0.8960                      | 1.0852                      |
| % Error ( $\% \text{ RSD} / \sqrt{n}$ )            | 0.3200       | 0.339                       | 0.4112                      |

**Table S3. Precision data for determination of the two studied drugs by the first derivative method.**

| <b>Concentration added (µg/ml)</b> | <b>% Found ± SD</b> | <b>% RSD</b> | <b>% Error</b> |
|------------------------------------|---------------------|--------------|----------------|
| <b>MET</b>                         |                     |              |                |
| Intra-day                          |                     |              |                |
| 5.00                               | 99.65± 0.95         | 0.95         | 0.55           |
| 15.00                              | 100.34± 0.72        | 0.72         | 0.41           |
| 25.00                              | 99.35± 0.91         | 0.91         | 0.53           |
| Inter-day                          |                     |              |                |
| 5.00                               | 99.22±1.00          | 1.00         | 0.58           |
| 15.00                              | 100.08± 0.68        | 0.67         | 0.39           |
| 25.00                              | 100.23± 0.88        | 0.88         | 0.51           |
| <b>ASP</b>                         |                     |              |                |
| Intra-day                          |                     |              |                |
| 5.00                               | 100.13 ± 0.86       | 0.86         | 0.50           |
| 10.00                              | 100.18± 0.94        | 0.94         | 0.54           |
| 20.00                              | 99.73 ± 0.61        | 0.61         | 0.35           |
| Inter-day                          |                     |              |                |
| 5.00                               | 99.33± 1.07         | 1.08         | 0.62           |
| 10.00                              | 99.71± 0.83         | 0.83         | 0.48           |
| 20.00                              | 100.44 ± 0.68       | 0.68         | 0.39           |

*N.B.* Each result is the average of three separate determinations.

**Table S4. Precision data for determination of the two studied drugs by the ratio first derivative method.**

| Concentration added ( $\mu\text{g/ml}$ )         | % Found $\pm$ SD  | % RSD | % Error |
|--------------------------------------------------|-------------------|-------|---------|
| <b>MET</b>                                       |                   |       |         |
| Intra-day                                        |                   |       |         |
| 5.00                                             | 100.22 $\pm$ 0.70 | 0.70  | 0.40    |
| 15.00                                            | 99.55 $\pm$ 0.91  | 0.85  | 0.49    |
| 25.00                                            | 99.56 $\pm$ 0.18  | 0.92  | 0.53    |
| Inter-day                                        |                   |       |         |
| 5.00                                             | 99.92 $\pm$ 1.30  | 1.31  | 0.75    |
| 15.00                                            | 99.27 $\pm$ 1.07  | 1.07  | 0.62    |
| 25.00                                            | 100.42 $\pm$ 0.85 | 0.85  | 0.49    |
| <b>ASP (<math>\lambda=238.2\text{nm}</math>)</b> |                   |       |         |
| Intra-day                                        |                   |       |         |
| 8.00                                             | 99.24 $\pm$ 1.16  | 1.17  | 0.68    |
| 16.00                                            | 100.15 $\pm$ 0.73 | 0.73  | 0.42    |
| 24.00                                            | 100.38 $\pm$ 0.91 | 0.91  | 0.52    |
| Inter-day                                        |                   |       |         |
| 8.00                                             | 99.63 $\pm$ 0.78  | 0.79  | 0.45    |
| 16.00                                            | 100.55 $\pm$ 0.75 | 0.74  | 0.43    |
| 24.00                                            | 99.92 $\pm$ 0.87  | 0.87  | 0.50    |
| <b>ASP (<math>\lambda=246\text{ nm}</math>)</b>  |                   |       |         |
| Intra-day                                        |                   |       |         |
| 8.00                                             | 99.55 $\pm$ 0.81  | 0.81  | 0.47    |
| 16.00                                            | 100.50 $\pm$ 1.03 | 1.03  | 0.59    |
| 24.00                                            | 99.30 $\pm$ 0.88  | 0.88  | 0.51    |
| Inter-day                                        |                   |       |         |
| 8.00                                             | 100.13 $\pm$ 0.88 | 0.87  | 0.51    |
| 16.00                                            | 99.53 $\pm$ 0.96  | 0.96  | 0.56    |
| 24.00                                            | 99.94 $\pm$ 0.66  | 0.66  | 0.38    |

*N.B.* Each result is the average of three separate determinations.
